# Supplementary material for: Multidrug-Resistant Bacterial Pathogens and Public Health: The Antimicrobial Effect of Cyanobacterial-Biosynthesized Silver Nanoparticles
Source: MDPI journal article supplement (doi:10.3390/antibiotics11081003), 2022-07-26
Supplement: s1 [file s1]

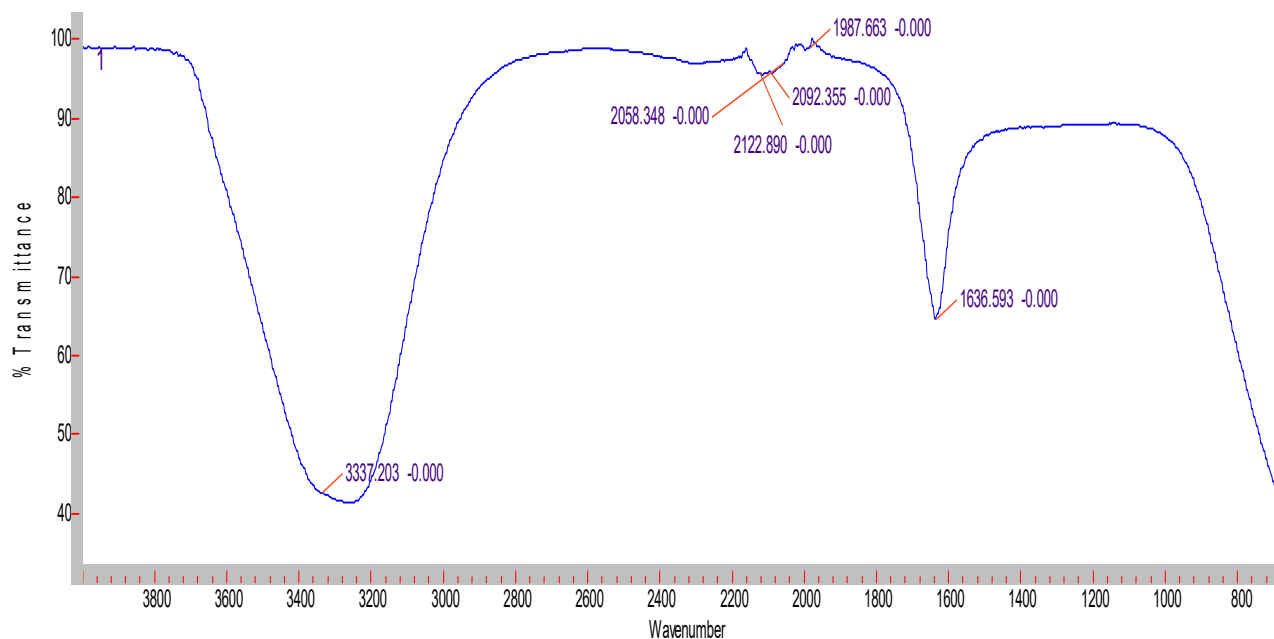

**Figure S1 :FTIR from middle- sized AgNPs. X-axis denotes wavenumber, Y-axis % Transmittance**

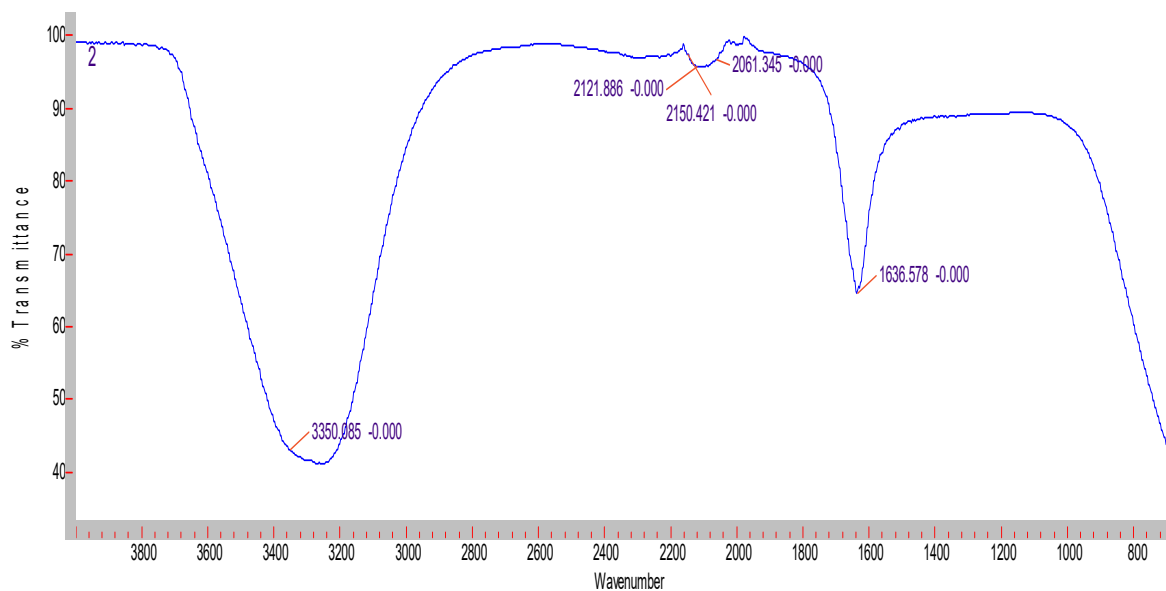

**Figure S2 :FTIR from largest sized AgNPs. X-axis denotes wavenumber, Y-axis % Transmittance**
